# Supplementary material
Source: Springer Nature journal article supplement (https://www.springermedizin.de/resource/supplementary/12888_2013_1627_MOESM6_ESM.pdf/9480982)

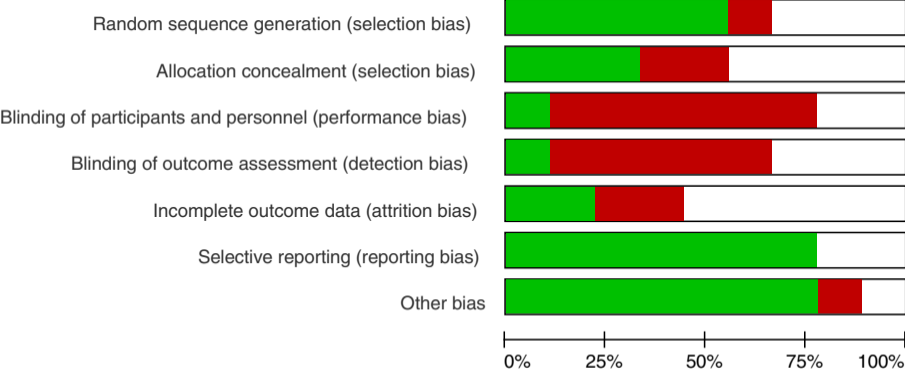

Low risk of bias

Unclear risk of bias

High risk of bias

Supplement: MOESM6 [file 9480982]
